# Supplementary material
Source: PubMed Central journal article supplement (PMC4272908)
Supplement: NIHMS641219-supplement-2.pdf [file NIHMS641219-supplement-2.pdf]

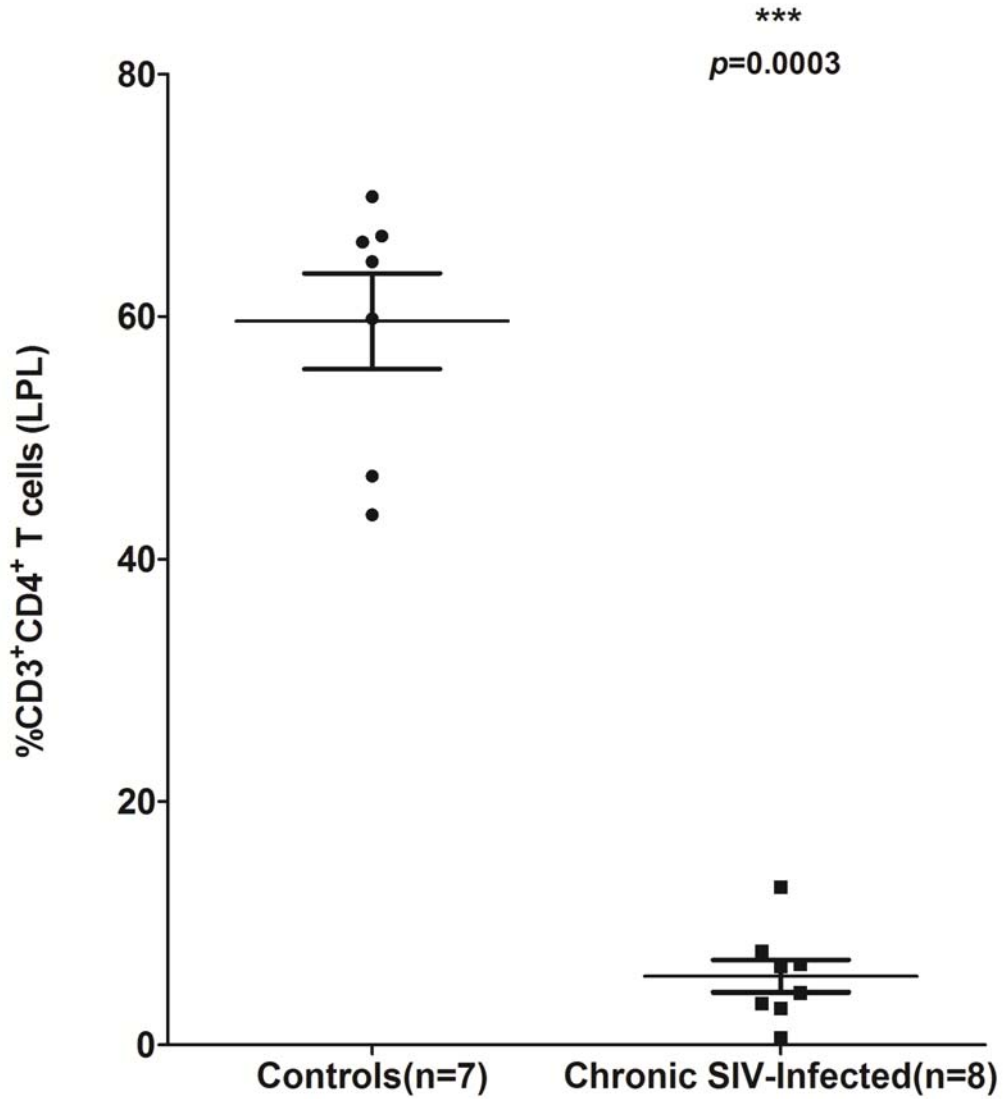

Supplemental Figure 1. Percentage of CD4<sup>+</sup> T cells among lamina propria leukocytes (LPLs) in chronically SIV-infected macaques. The cells were first gated on singlets followed by lymphocytes, CD3 and then on CD3<sup>+</sup>CD4<sup>+</sup> T cell subsets. Data was analyzed using Wilcoxon's rank sum test. The error bars represent standard error of mean CD4<sup>+</sup> T cell percentage within each group. Triple asterisks (\*\*\*) indicate statistical significance ( $p < 0.001$ ) compared to uninfected controls.

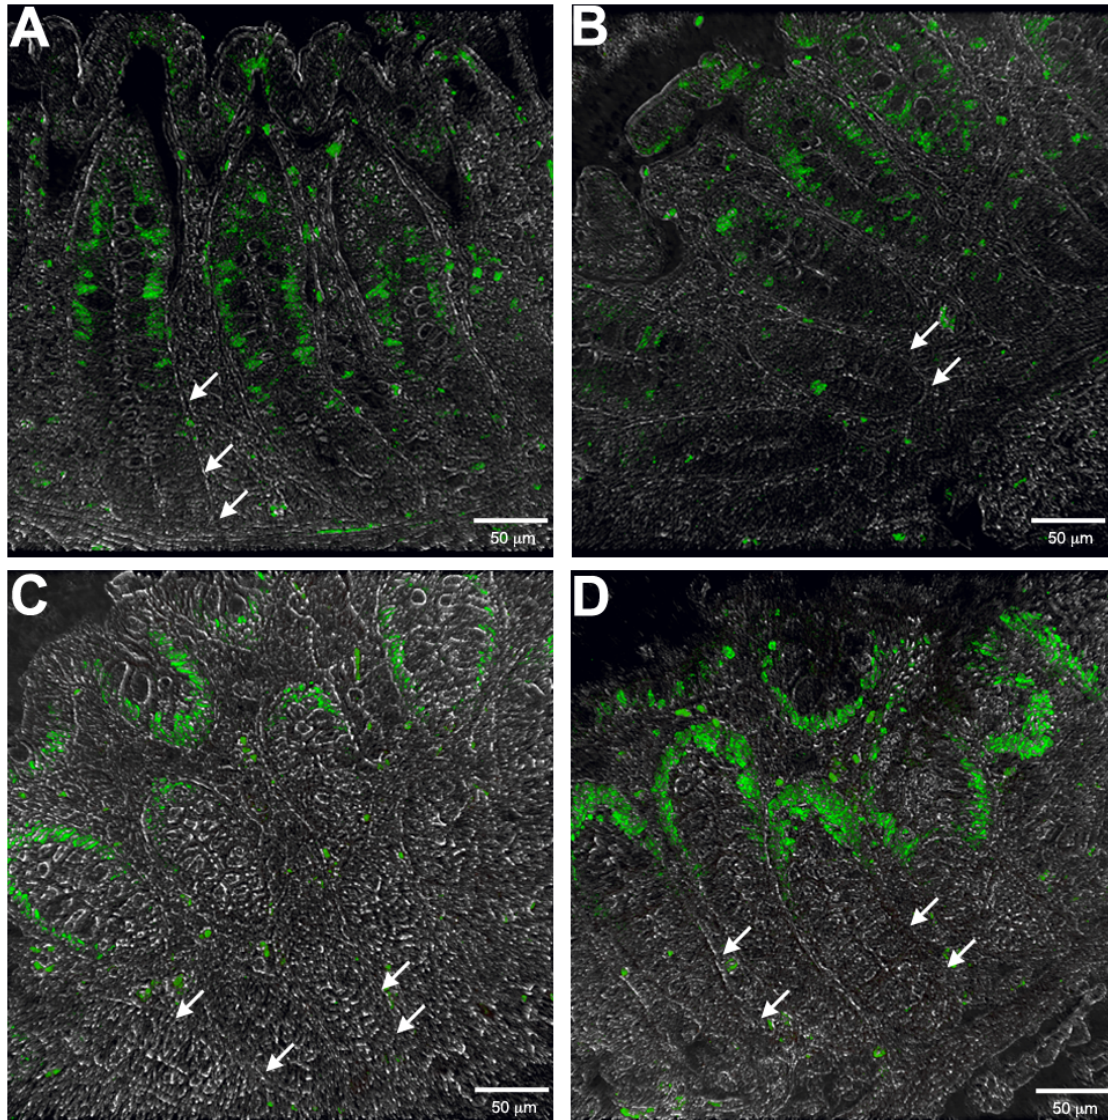

Supplemental Figure 2. Colon: Differentiated enterocytes near the lumen and not crypt epithelial cells stain positive for cyclin dependent kinase inhibitor p21 in two different regions shown in a chronic-SIV infected (**A-B**) and uninfected control macaque (**C-D**). White arrows demarcate the lower outer boundaries of crypts. This suggests the absence of cell cycle arrest or cellular senescence in colonic crypt epithelial cells.
